# Supplementary material for: In-Depth Immunological Typization of Children with Sickle Cell Disease: A Preliminary Insight into Its Plausible Correlation with Clinical Course and Hydroxyurea Therapy
Source: MDPI journal article supplement (doi:10.3390/jcm11113037), 2022-05-27
Supplement: s1 [file s1]

**Supplementary Table S1.** Correlation analysis between mean count of immunological variables and crisis score in SCD group

| SCD group             |                                                        | Univariate analysis | Multivariate analysis |
|-----------------------|--------------------------------------------------------|---------------------|-----------------------|
| Variables             |                                                        | Pearson's R         | Pearson's R           |
| Basic features        | WBC (cell/ul)                                          | >0.05               | >0.05                 |
|                       | Neutrophils (cell/ul)                                  | >0.05               | >0.05                 |
|                       | Neutrophils (%†)                                       | >0.05               | >0.05                 |
|                       | Lymphocytes (cell/ul)                                  | >0.05               | >0.05                 |
|                       | Lymphocytes (%†)                                       | >0.05               | >0.05                 |
|                       | CD3+ PAN-T cells (%‡)                                  | >0.05               | >0.05                 |
|                       | CD4+/CD8+ ratio                                        | >0.05               | >0.05                 |
| CD4+ T-cell subsets   | CD3+CD4+ T cells (cell/ul)                             | >0.05               | >0.05                 |
|                       | CD3+CD4+ T cells (%‡)                                  | >0.05               | >0.05                 |
|                       | CD4+CD45RA+CCR7+ naïve T cells (%§)                    | >0.05               | >0.05                 |
|                       | CD4+CD45RA-CCR7+ central memory T cells (%§)           | >0.05               | *0.039                |
|                       | CD4+CD45RA-CCR7- effector memory T cells (%§)          | >0.05               | >0.05                 |
|                       | CD4+CD45RA+CCR7- terminal effector memory T cells (%§) | >0.05               | >0.05                 |
|                       | CD4+CD127-CCR7+CD25++ regulatory T cells (%§)          | >0.05               | >0.05                 |
| CD8+ T-cell subsets   | CD3+CD8+ T cells (cell/ul)                             | >0.05               | >0.05                 |
|                       | CD3+CD8+ T cells (%‡)                                  | >0.05               | >0.05                 |
|                       | CD8+CD45RA+CCR7+ naïve T cells (%¶)                    | >0.05               | >0.05                 |
|                       | CD8+CD45RA-CCR7+ central memory T cells (%¶)           | >0.05               | >0.05                 |
|                       | CD8+CD45RA-CCR7- effector memory T cells (%¶)          | >0.05               | >0.05                 |
|                       | CD8+CD45RA+CCR7- late effector T cells (%¶)            | >0.05               | >0.05                 |
|                       | CD56+CD16+CD3- natural killer cells (%‡)               | >0.05               | >0.05                 |
| Other cell subsets    | TCRαβ+CD3+CD4-CD8- double negative T cells (%††)       | >0.05               | >0.05                 |
|                       | CD3+γ+δ+ (%‡)                                          | >0.05               | >0.05                 |
|                       |                                                        |                     |                       |
| CD19+ B-cell subsets  | CD19+ PAN-B cells (cell/ul)                            | >0.05               | >0.05                 |
|                       | CD19+ PAN-B cells (%‡)                                 | >0.05               | >0.05                 |
|                       | CD19+IgD+CD27- naïve B cells (%‡‡)                     | >0.05               | >0.05                 |
|                       | CD19+IgM++CD38++ transitional B cells (%‡‡)            | >0.05               | >0.05                 |
|                       | CD19+IgD+CD27+ memory B cells (%‡‡)                    | *0.010              | >0.05                 |
|                       | CD19+IgD-CD27+ switched memory B cells (%‡‡)           | >0.05               | >0.05                 |
|                       | CD19+CD21+ CD38- CD21low B cells (%‡‡)                 | >0.05               | >0.05                 |
|                       | CD19+IgM-+CD38++ plasmablasts (%‡‡)                    | >0.05               | >0.05                 |
| Immunoglobulin levels | IgG (mg/dl)§§                                          | >0.05               | >0.05                 |
|                       | IgA (mg/dl)§§                                          | >0.05               | >0.05                 |
|                       | IgM (mg/dl)§§                                          | >0.05               | >0.05                 |
|                       | IgE (mg/dl)§§                                          | >0.05               | >0.05                 |

**Supplementary Table.** Abbreviations: HU, hydroxyurea; SCD, Sickle cell disease; WBC, white blood cells.

\* Statistically significant.

† % total WBC.

‡ % total lymphocytes.

§ % total CD4+ cells.

¶ % total CD8+ cells.

†† % TCRαβ+CD3+ cells.

‡‡ % total CD19+ cells

§§ SI conversion factor: To convert IgG/IgA/IgM to g/L, multiply values by 10<sup>2</sup>.
